# Supplementary material for: Tracing ultrahigh-pressure metamorphism at the catchment scale
Source: Springer Nature journal article supplement (doi:10.1038/s41598-018-21262-8), 2018-02-07
Supplement: MOESM1 [file 41598_2018_21262_MOESM1_ESM.pdf]

## **Tracing ultrahigh-pressure metamorphism at the catchment scale**

J. Schönig<sup>1</sup>, G. Meinhold<sup>1,2</sup>, H. von Eynatten<sup>1</sup> & N. K. Lünsdorf<sup>1</sup>

<sup>1</sup>Department of Sedimentology and Environmental Geology, Geoscience Centre Göttingen, University of Göttingen, Goldschmidtstraße 3, 37077 Göttingen, Germany

<sup>2</sup>School of Geography, Geology and the Environment, Keele University, Keele, Staffordshire, ST5 5BG, UK

Correspondence should be addressed to J.S. (e-mail: jan.schoenig@uni-goettingen.de)

### **Supplementary Information**

#### **Description of the coesite-bearing detrital garnets**

Garnet grain number 24 (Supplementary Fig. 1) is intergrown by plagioclase and quartz. One spheroidal coesite inclusion of  $5.5 \mu\text{m} \times 2.5 \mu\text{m}$  in size is present close to the garnet rim. The coesite main band of the Raman spectrum is located at  $\sim 524.0 \text{ cm}^{-1}$ , which represents a shift to higher relative wavenumbers compared to the main band position of measured relictic coesite cores in bimineralic  $\text{SiO}_2$  inclusions in ruptured omphacite detected in a thin section from a known UHP eclogite. The shift of  $\sim 3.3 \text{ cm}^{-1}$  is equal to inclusion overpressures of  $\sim 1.1 \text{ GPa}$  (see methods). Close to the coesite inclusion ( $< 5 \mu\text{m}$ ), one almost idiomorphic plagioclase crystal is present within the garnet. This plagioclase looks like an inclusion, but it is probably connected to the lower surface of the garnet and thus, also represents an intergrown mineral. In addition, two inclusions (probably also not completely enveloped by

garnet) occur at or very close to the lower surface of the garnet, with Raman spectra being typical for organic matter with a very low maturity.

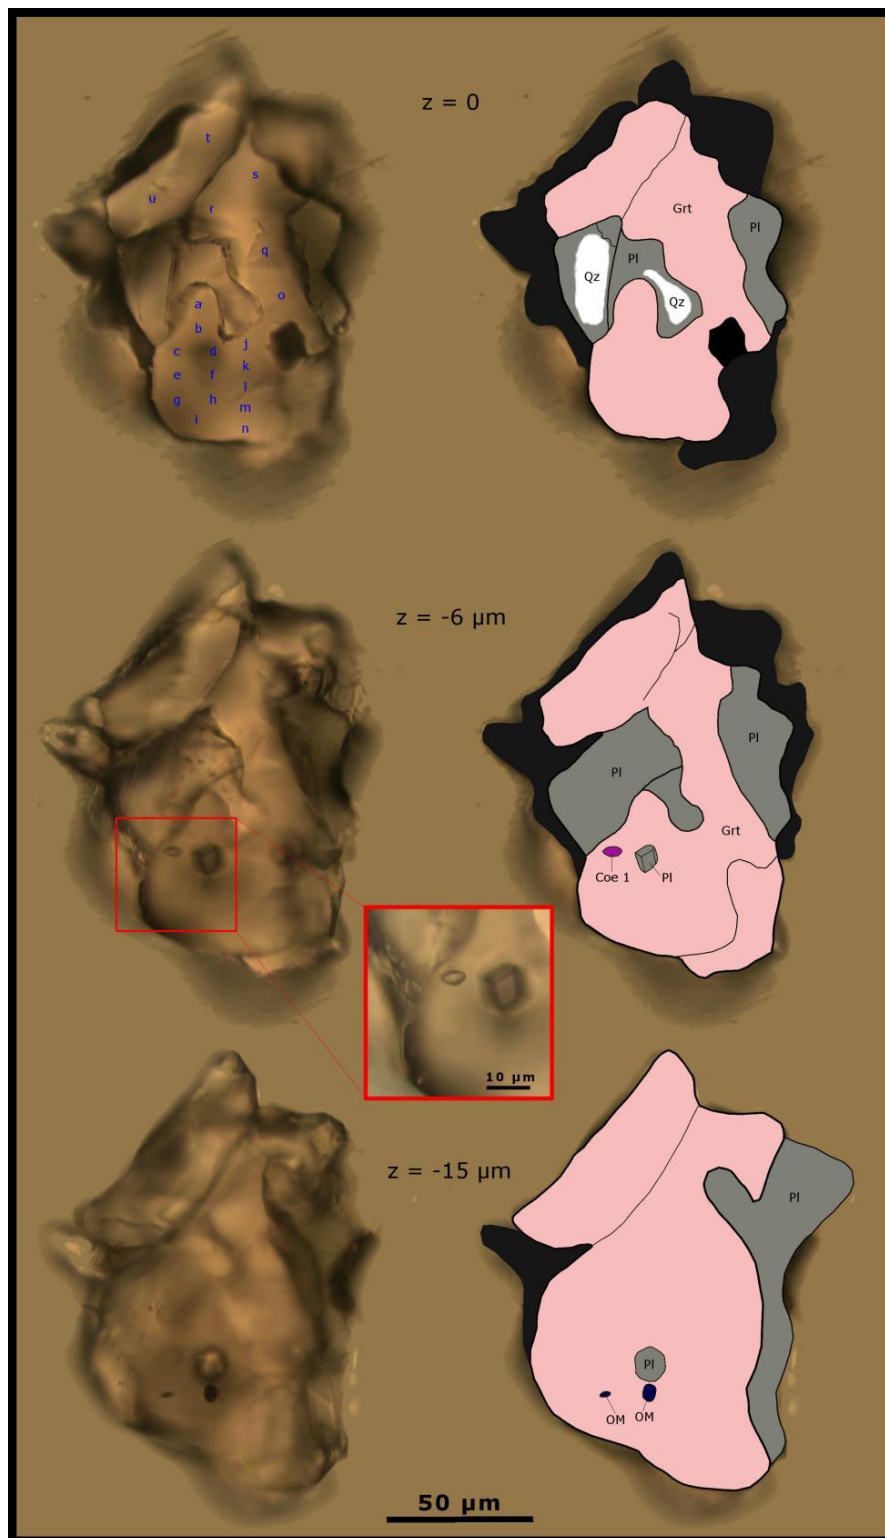

**Supplementary Figure 1: Coesite and other mineral inclusions in detrital garnet (grain number 24).** Grain photographed in three different  $z$ -positions of the focal plane ( $z = 0$  equates to the polished surface) and corresponding schematic illustrations showing the mineral paragenesis. Out of focus zones are coloured in black. Blue characters indicate electron microprobe measurement spots as designated in Supplementary Table 1. Abbreviations: Coe – coesite; Grt – garnet; OM – organic matter; Qz – quartz; Pl – plagioclase.

Similar to grain number 24, also grain number 98 (Supplementary Fig. 2) does not consist solely of garnet. Intergrown plagioclase and quartz separate three garnet segments. It is not allocatable if the garnet segments were primarily connected to each other, but because they are connected to a lithoclast, they must originate from the same source lithology. One spheroidal coesite inclusion of  $3.5 \mu\text{m} \times 2.0 \mu\text{m}$  in size is present in one of the segments. The coesite main band of its Raman spectrum is located at  $\sim 523.8 \text{ cm}^{-1}$ , representing a shift to higher wavenumbers by  $\sim 3.1 \text{ cm}^{-1}$ , which indicates inclusion overpressures of  $\sim 1.1 \text{ GPa}$  (see methods). In the other garnet segments, several inclusions of quartz occur, which are larger than the coesite inclusion and at least one of the quartz inclusion shows fractures originating from the inclusion/host boundary and spreading out into the garnet host until encountering the segment rims. Besides the quartz inclusions, also a small ( $\sim 2 \mu\text{m}$  in diameter) calcite inclusion is present in one of the segments.

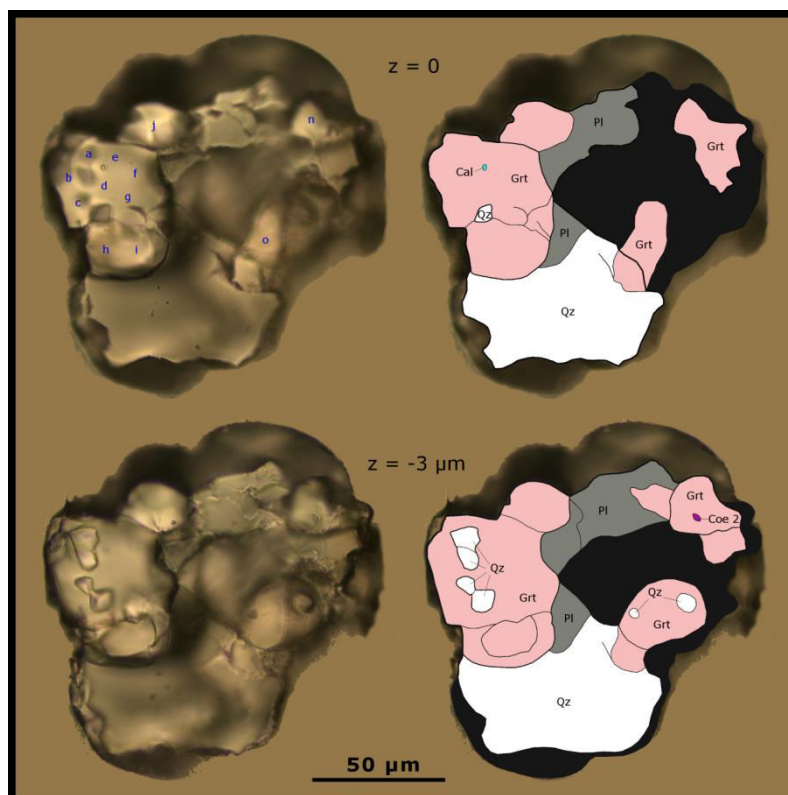

**Supplementary Figure 2: Coesite and other mineral inclusions in detrital garnet (grain number 98).** Grain photographed in two different  $z$ -positions of the focal plane ( $z = 0$  equates to the polished surface) and corresponding schematic illustrations showing the mineral paragenesis. Out of focus zones are coloured in black. Blue characters indicate electron microprobe measurement spots as designated in Supplementary Table 1. Abbreviations: Cal – calcite; Coe – coesite; Grt – garnet; Qz – quartz; Pl – plagioclase.

Grain number 142 (Supplementary Fig. 3) represents a single garnet grain, whereby three spheroidal coesite inclusions occur close to its lower surface. The first coesite inclusion is  $3.1 \mu\text{m} \times 2.2 \mu\text{m}$  in size and the main band is located at  $\sim 522.9 \text{ cm}^{-1}$ , the second is  $5.2 \mu\text{m} \times 2.7 \mu\text{m}$  in size with the main band at  $\sim 522.9 \text{ cm}^{-1}$ , and the third is  $6.6 \mu\text{m} \times 3.5 \mu\text{m}$  in size with the main band position of  $\sim 523.1 \text{ cm}^{-1}$ . Thus, the shift to higher relative wavenumbers of between  $\sim 2.2$  and  $2.4 \text{ cm}^{-1}$  indicates inclusion overpressures of  $\sim 0.8 \text{ GPa}$  (see methods). In addition to coesite, also few inclusions of apatite and quartz are present. In the vicinity of the coesite inclusions, the quartz inclusions are larger than the coesite inclusions, but more distant also a single smaller quartz inclusion occurs. Furthermore, two fluid inclusions ( $\text{CO}_2$ ) are present close to the lower surface of the garnet grain.

As grain number 142, also grain number 209 (Fig. 2) represents a single garnet grain, but it contains a different configuration of mineral inclusions occurring together with coesite compared to the grains mentioned before. Overall, five coesite inclusions are present within the garnet, which are located close to each other and have a spherical to spheroidal shape. The first coesite inclusion is  $11.6 \mu\text{m} \times 7.4 \mu\text{m}$  in size and the main band is located at  $\sim 523.4 \text{ cm}^{-1}$ , the second is  $9.8 \mu\text{m} \times 6.1 \mu\text{m}$  in size with the main band at  $\sim 523.2 \text{ cm}^{-1}$ , the third is  $6.5 \mu\text{m} \times 4.8 \mu\text{m}$  in size with the main band position of  $\sim 523.1 \text{ cm}^{-1}$ , the fourth measures  $6.4 \mu\text{m} \times 4.1 \mu\text{m}$  with the main band at  $\sim 522.6 \text{ cm}^{-1}$ , and the fifth is  $6.0 \mu\text{m} \times 5.3 \mu\text{m}$  in size with the main band position of  $\sim 523.1 \text{ cm}^{-1}$ . Thus, the shift to higher relative wavenumbers of between  $\sim 1.9$  and  $2.7 \text{ cm}^{-1}$  indicates inclusion overpressures of between  $\sim 0.6$  and  $0.9 \text{ GPa}$  (see methods). Additionally, several quartz inclusions are present, whereby two of them are directly surrounded by the coesite inclusions and at the closest point coesite and quartz are isolated from each other by garnet of  $<5 \mu\text{m}$  thickness. However, while all of the coesite inclusions are completely intact, all quartz inclusions are either located directly at the rim (not completely enclosed in garnet), or they are connected to the rim by fractures. Besides coesite and quartz, numerous small inclusions of rutile, several inclusions of kyanite, few inclusions

of clinopyroxene (diopside–omphacite), a single mica (phlogopite–biotite) inclusion, and a single gypsum inclusion occur. In addition, one inclusion of organic matter with a very low maturity is located directly at the lower surface, which is probably not completely enveloped by garnet, similar to the organic matter inclusions in grain number 24.

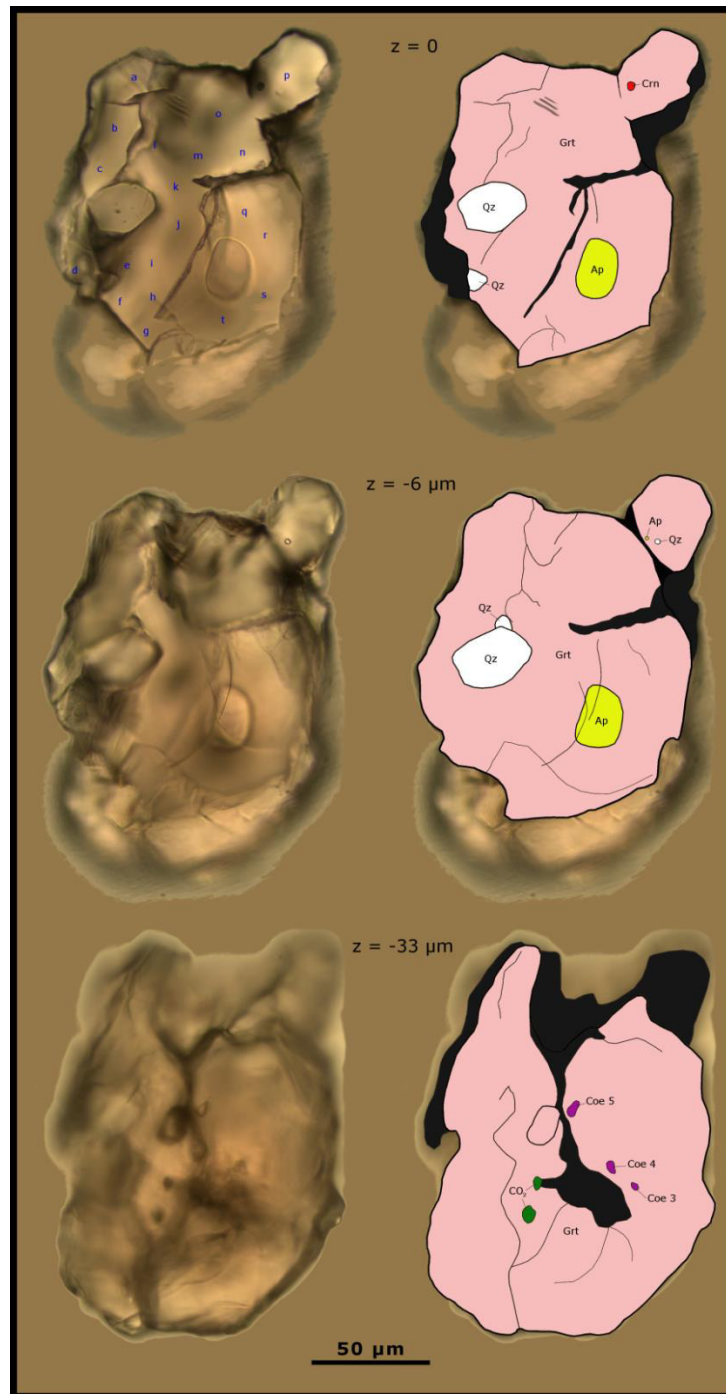

**Supplementary Figure 3: Coesite and other mineral inclusions in detrital garnet (grain number 142).** Grain photographed in three different  $z$ -positions of the focal plane ( $z = 0$  equates to the polished surface) and corresponding schematic illustrations showing the mineral paragenesis. Out of focus zones are coloured in black. Blue characters indicate electron microprobe measurement spots as designated in Supplementary Table 1. Abbreviations: Ap – apatite; Coe – coesite; Crn – corundum; Grt – garnet; Qz – quartz.

Grain number 378 (Fig. 3) also represents a single garnet grain. Within that garnet two coesite inclusions occur. The first coesite inclusion has a spheroidal shape, is  $2.8 \mu\text{m} \times 1.7 \mu\text{m}$  in size, and the coesite main band is located at  $\sim 523.1 \text{ cm}^{-1}$ , indicating a shift to higher relative wavenumbers of  $\sim 2.4 \text{ cm}^{-1}$  equal to an inclusion overpressure of  $\sim 0.8 \text{ GPa}$ . The second coesite inclusion has a spherical shape, a diameter of  $1.0 \mu\text{m}$ , and its main band is located at  $\sim 523.7 \text{ cm}^{-1}$ , indicating a shift of  $\sim 3.0 \text{ cm}^{-1}$  equal to an overpressure of  $\sim 1.0 \text{ GPa}$  (see methods). Besides coesite, numerous inclusions of quartz, few inclusions of feldspar, few inclusions of a sulphate-mineral, and a single very small orthopyroxene (probably enstatite) inclusion occur. The quartz inclusions are larger than the two coesite inclusions, and often they are also cross-linked with each other. Several of the quartz inclusions show fractures originating from the inclusion/host boundary. In addition to the inclusion types, several mica (phlogopite–biotite) fragments are present at the garnet rim and lower surface, probably representing a contact phase from the source rock.

Grain number 452 (Supplementary Fig. 4) is also a single garnet grain which contains one spheroidal coesite inclusion. The coesite inclusion is  $2.5 \mu\text{m} \times 1.5 \mu\text{m}$  in size, and the Raman main band is located at  $\sim 523.3 \text{ cm}^{-1}$ , indicating a shift to higher relative wavenumbers of  $\sim 2.6 \text{ cm}^{-1}$  equal to an inclusion overpressure of  $\sim 0.9 \text{ GPa}$  (see methods). Besides coesite, several quartz inclusions are present, which are all larger than the coesite inclusion and mainly located at the garnet rim.

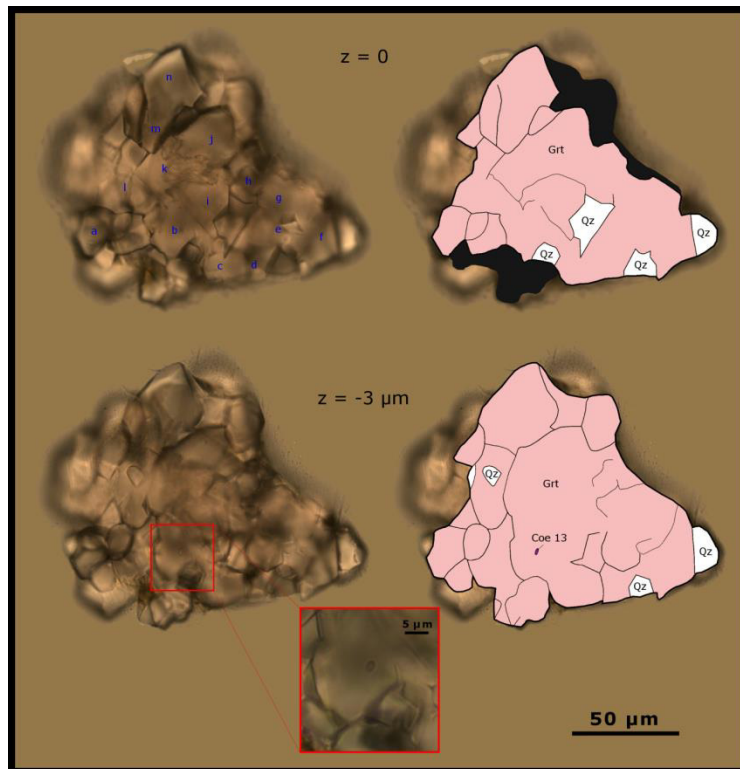

**Supplementary Figure 4:** Coesite and other mineral inclusions in detrital garnet (grain number 452). Grain photographed in two different  $z$ -positions of the focal plane ( $z = 0$  equates to the polished surface) and corresponding schematic illustrations showing the mineral paragenesis. Out of focus zones are coloured in black. Blue characters indicate electron microprobe measurement spots as designated in Supplementary Table 1. Abbreviations: Coe – coesite; Grt – garnet; Qz – quartz.

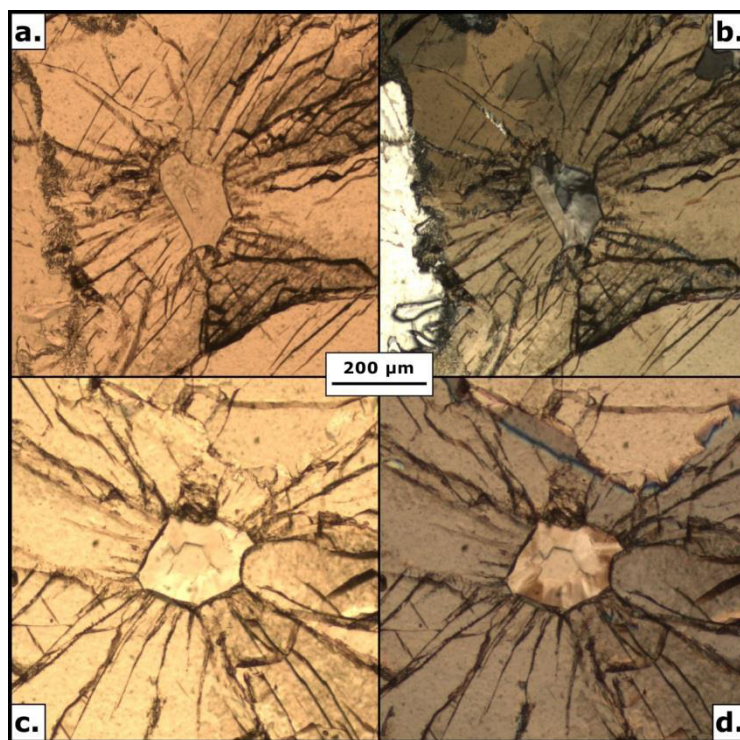

**Supplementary Figure 5:** Bimineralic coesite/quartz inclusions in ruptured omphacite of the UHP eclogite at Flatraket harbour (sample AK-N12<sup>25</sup>). The two inclusions are shown in transmitted light (a and c) and with crossed polarizers (b and d). Both show a relictic coesite core and a fine-grained palisade quartz rim. Note the bimineralic inclusions are significantly larger than the intact monomineralic inclusions detected in the detrital garnets of Runde.

**Supplementary Table 1: Geochemical garnet compositions.** Electron microprobe data and calculated main endmembers<sup>59</sup>. Grain number 1–209 from the 63–125  $\mu\text{m}$  grain-size fraction, number 352–452 from the 125–250  $\mu\text{m}$  fraction, and number 706–755 from the 250–500  $\mu\text{m}$  fraction. Abbreviations: Alm – almandine; Sps – spessartine; Prp – pyrope; Grs – grossular.

| Grain number | electron microprobe data<br>[wt%] |        |        |                  |                      |                                |                                |       | normalised endmembers calculated <sup>59</sup><br>[mol%] |        |        |        |
|--------------|-----------------------------------|--------|--------|------------------|----------------------|--------------------------------|--------------------------------|-------|----------------------------------------------------------|--------|--------|--------|
|              | SiO <sub>2</sub>                  | MgO    | CaO    | TiO <sub>2</sub> | FeO <sub>total</sub> | Al <sub>2</sub> O <sub>3</sub> | Cr <sub>2</sub> O <sub>3</sub> | MnO   | Alm                                                      | Sps    | Prp    | Grs    |
| 1            | 38.640                            | 6.580  | 9.980  | <0.023           | 22.300               | 21.880                         | <0.027                         | 0.421 | 46.570                                                   | 0.939  | 25.694 | 26.797 |
| 2            | 39.690                            | 10.370 | 9.210  | 0.030            | 16.880               | 22.240                         | 0.268                          | 0.539 | 35.524                                                   | 1.166  | 39.428 | 23.882 |
| 3            | 38.320                            | 8.160  | 3.180  | <0.023           | 26.740               | 21.800                         | <0.026                         | 1.660 | 56.338                                                   | 3.714  | 32.113 | 7.836  |
| 4            | 37.940                            | 4.700  | 9.550  | 0.050            | 24.620               | 21.220                         | <0.026                         | 1.420 | 52.753                                                   | 3.243  | 18.913 | 25.090 |
| 5            | 37.050                            | 1.526  | 9.860  | 0.044            | 27.360               | 21.100                         | <0.027                         | 2.590 | 60.082                                                   | 5.980  | 6.194  | 27.745 |
| 6            | 37.270                            | 7.110  | 3.240  | <0.023           | 28.150               | 21.600                         | <0.026                         | 1.350 | 59.605                                                   | 3.085  | 28.640 | 8.669  |
| 7            | 38.000                            | 8.660  | 2.120  | <0.023           | 27.600               | 21.610                         | <0.027                         | 1.010 | 58.572                                                   | 2.278  | 34.431 | 4.719  |
| 8            | 38.740                            | 7.190  | 10.440 | 0.052            | 21.120               | 21.570                         | <0.026                         | 0.287 | 44.072                                                   | 0.641  | 28.403 | 26.884 |
| 9            | 38.600                            | 6.190  | 10.610 | <0.023           | 22.620               | 21.610                         | 0.048                          | 0.543 | 46.711                                                   | 1.226  | 24.566 | 27.497 |
| 10           | 38.390                            | 7.170  | 6.460  | <0.024           | 25.150               | 21.780                         | <0.026                         | 0.949 | 52.752                                                   | 2.122  | 28.232 | 16.894 |
| 11           | 37.350                            | 3.080  | 7.450  | 0.044            | 29.690               | 21.180                         | <0.026                         | 1.430 | 64.337                                                   | 3.303  | 12.521 | 19.839 |
| 12           | 38.530                            | 7.880  | 4.040  | 0.043            | 27.070               | 21.660                         | <0.026                         | 0.958 | 57.340                                                   | 2.148  | 31.075 | 9.437  |
| 13           | 37.980                            | 6.710  | 4.390  | <0.023           | 26.980               | 21.690                         | 0.035                          | 1.770 | 57.686                                                   | 3.975  | 26.495 | 11.844 |
| 14           | 37.880                            | 4.960  | 7.470  | <0.023           | 27.200               | 21.450                         | <0.027                         | 0.790 | 58.353                                                   | 1.790  | 19.785 | 20.072 |
| 15           | 38.250                            | 7.590  | 4.710  | <0.023           | 27.390               | 21.140                         | <0.027                         | 0.789 | 57.732                                                   | 1.820  | 30.791 | 9.657  |
| 16           | 39.440                            | 11.270 | 7.700  | <0.022           | 18.380               | 22.110                         | 0.034                          | 0.421 | 36.488                                                   | 0.933  | 43.692 | 18.887 |
| 17           | 38.130                            | 5.710  | 7.790  | <0.023           | 26.170               | 21.580                         | <0.027                         | 0.597 | 55.355                                                   | 1.346  | 22.693 | 20.606 |
| 18           | 38.840                            | 6.730  | 6.650  | 0.023            | 24.630               | 22.030                         | <0.027                         | 1.790 | 52.222                                                   | 3.918  | 25.954 | 17.905 |
| 19           | 37.970                            | 6.900  | 4.770  | <0.023           | 27.530               | 21.500                         | <0.028                         | 1.062 | 58.206                                                   | 2.418  | 27.625 | 11.751 |
| 20           | 38.570                            | 6.570  | 7.930  | <0.022           | 24.760               | 21.610                         | <0.026                         | 0.521 | 52.404                                                   | 1.169  | 25.874 | 20.554 |
| 21           | 37.840                            | 6.630  | 2.790  | <0.023           | 28.040               | 21.890                         | <0.027                         | 2.510 | 60.360                                                   | 5.615  | 26.123 | 7.902  |
| 22           | 36.720                            | 1.770  | 8.650  | 0.031            | 25.340               | 20.940                         | <0.027                         | 5.740 | 55.184                                                   | 13.436 | 7.289  | 24.091 |
| 23           | 38.400                            | 7.980  | 4.400  | <0.023           | 26.090               | 21.850                         | <0.027                         | 1.201 | 54.729                                                   | 2.682  | 31.341 | 11.249 |
| 24a          | 38.280                            | 6.320  | 6.270  | <0.023           | 24.540               | 21.520                         | <0.026                         | 2.980 | 52.137                                                   | 6.713  | 25.038 | 16.112 |
| 24b          | 38.160                            | 6.620  | 6.020  | <0.023           | 24.420               | 21.490                         | <0.027                         | 2.940 | 51.671                                                   | 6.644  | 26.350 | 15.335 |
| 24c          | 38.620                            | 6.640  | 5.890  | <0.023           | 24.600               | 21.880                         | <0.027                         | 2.780 | 52.277                                                   | 6.134  | 25.800 | 15.789 |
| 24d          | 37.700                            | 6.820  | 5.980  | <0.024           | 24.490               | 21.400                         | <0.026                         | 2.890 | 50.799                                                   | 6.654  | 27.651 | 14.896 |
| 24e          | 38.910                            | 6.610  | 6.200  | 0.031            | 24.440               | 21.950                         | <0.027                         | 2.680 | 52.159                                                   | 5.872  | 25.484 | 16.485 |
| 24f          | 37.790                            | 6.990  | 5.960  | <0.023           | 24.570               | 21.530                         | <0.027                         | 2.780 | 50.513                                                   | 6.381  | 28.253 | 14.854 |
| 24g          | 39.190                            | 6.400  | 6.390  | 0.026            | 24.140               | 21.770                         | <0.027                         | 2.860 | 52.454                                                   | 6.295  | 24.431 | 16.820 |



| Grain number | electron microprobe data<br>[wt%] |        |       |                  |                      |                                |                                |       | normalised endmembers calculated <sup>59</sup><br>[mol%] |       |        |        |
|--------------|-----------------------------------|--------|-------|------------------|----------------------|--------------------------------|--------------------------------|-------|----------------------------------------------------------|-------|--------|--------|
|              | SiO <sub>2</sub>                  | MgO    | CaO   | TiO <sub>2</sub> | FeO <sub>total</sub> | Al <sub>2</sub> O <sub>3</sub> | Cr <sub>2</sub> O <sub>3</sub> | MnO   | Alm                                                      | Sps   | Prp    | Grs    |
| 24h          | 37.910                            | 6.900  | 6.210 | 0.029            | 24.020               | 21.360                         | <0.026                         | 2.760 | 50.436                                                   | 6.318 | 27.816 | 15.430 |
| 24i          | 38.710                            | 6.330  | 6.520 | 0.029            | 24.340               | 21.710                         | <0.027                         | 2.910 | 51.957                                                   | 6.457 | 24.708 | 16.878 |
| 24j          | 36.020                            | 7.190  | 5.790 | 0.026            | 24.300               | 20.420                         | <0.027                         | 2.990 | 48.858                                                   | 7.459 | 31.579 | 12.104 |
| 24k          | 33.010                            | 7.660  | 5.630 | <0.024           | 24.480               | 18.400                         | <0.027                         | 2.820 | 46.045                                                   | 8.347 | 39.928 | 5.681  |
| 24l          | 32.580                            | 7.630  | 5.710 | <0.023           | 24.650               | 18.260                         | <0.026                         | 2.860 | 45.361                                                   | 8.681 | 40.735 | 5.224  |
| 24m          | 34.870                            | 7.490  | 5.860 | <0.023           | 24.650               | 19.530                         | <0.027                         | 2.900 | 47.550                                                   | 7.806 | 35.466 | 9.177  |
| 24n          | 35.850                            | 7.260  | 5.860 | 0.025            | 24.320               | 20.370                         | <0.027                         | 2.980 | 48.302                                                   | 7.505 | 32.190 | 12.003 |
| 24o          | 37.610                            | 6.890  | 5.800 | <0.023           | 24.440               | 21.150                         | <0.027                         | 3.050 | 50.930                                                   | 7.096 | 28.214 | 13.760 |
| 24q          | 36.680                            | 6.610  | 6.330 | <0.024           | 24.300               | 20.620                         | <0.027                         | 2.930 | 50.199                                                   | 7.093 | 28.167 | 14.541 |
| 24r          | 38.500                            | 6.500  | 6.600 | <0.023           | 23.930               | 21.570                         | <0.026                         | 2.690 | 51.267                                                   | 6.003 | 25.527 | 17.204 |
| 24s          | 37.690                            | 6.780  | 6.290 | <0.023           | 24.410               | 21.050                         | <0.027                         | 3.020 | 50.519                                                   | 7.070 | 27.920 | 14.490 |
| 24t          | 34.370                            | 7.420  | 6.150 | <0.024           | 23.890               | 19.460                         | <0.027                         | 2.980 | 45.587                                                   | 8.110 | 35.528 | 10.775 |
| 24u          | 36.860                            | 7.500  | 5.500 | <0.023           | 24.740               | 20.760                         | <0.027                         | 3.080 | 49.381                                                   | 7.499 | 32.146 | 10.975 |
| 25           | 38.340                            | 6.360  | 6.650 | <0.023           | 25.060               | 21.830                         | <0.027                         | 1.610 | 53.370                                                   | 3.572 | 24.843 | 18.215 |
| 26           | 37.770                            | 4.980  | 5.730 | 0.044            | 29.630               | 21.020                         | <0.027                         | 1.020 | 63.938                                                   | 2.360 | 20.307 | 13.395 |
| 27           | 38.120                            | 6.650  | 1.750 | <0.023           | 31.370               | 21.520                         | <0.027                         | 1.019 | 67.659                                                   | 2.295 | 26.334 | 3.712  |
| 28           | 38.740                            | 6.340  | 9.640 | <0.023           | 22.800               | 21.860                         | <0.027                         | 0.657 | 48.037                                                   | 1.454 | 24.675 | 25.834 |
| 29           | 40.120                            | 13.720 | 3.770 | <0.023           | 19.390               | 22.820                         | <0.025                         | 0.496 | 38.316                                                   | 1.063 | 51.528 | 9.094  |
| 30           | 38.020                            | 4.930  | 7.280 | 0.054            | 27.750               | 21.550                         | <0.027                         | 0.667 | 59.527                                                   | 1.504 | 19.577 | 19.392 |
| 31           | 38.570                            | 6.380  | 6.960 | <0.023           | 25.850               | 21.930                         | <0.027                         | 0.878 | 54.504                                                   | 1.942 | 24.858 | 18.697 |
| 32           | 38.470                            | 5.020  | 9.660 | 0.032            | 24.810               | 21.800                         | <0.027                         | 0.767 | 52.562                                                   | 1.701 | 19.660 | 26.077 |
| 33           | 38.440                            | 5.490  | 7.490 | <0.023           | 26.810               | 21.800                         | <0.026                         | 0.585 | 57.020                                                   | 1.300 | 21.475 | 20.205 |
| 34           | 38.250                            | 5.420  | 6.690 | 0.038            | 26.960               | 21.730                         | <0.026                         | 1.320 | 57.717                                                   | 2.945 | 21.284 | 18.054 |
| 35           | 38.830                            | 6.230  | 9.930 | 0.041            | 21.740               | 22.050                         | <0.026                         | 1.870 | 45.159                                                   | 4.122 | 24.171 | 26.548 |
| 36           | 38.650                            | 6.490  | 9.740 | 0.029            | 22.890               | 22.180                         | <0.026                         | 0.583 | 47.088                                                   | 1.288 | 25.209 | 26.415 |
| 37           | 38.460                            | 7.910  | 2.050 | <0.024           | 29.120               | 21.870                         | <0.027                         | 1.185 | 61.615                                                   | 2.631 | 30.961 | 4.793  |
| 38           | 39.030                            | 8.320  | 6.570 | 0.056            | 24.340               | 21.930                         | <0.027                         | 0.539 | 50.248                                                   | 1.199 | 32.510 | 16.043 |
| 39           | 38.430                            | 8.130  | 2.240 | <0.024           | 27.430               | 22.120                         | <0.027                         | 1.960 | 57.897                                                   | 4.317 | 31.537 | 6.249  |
| 41           | 38.320                            | 8.130  | 2.220 | <0.024           | 27.650               | 21.730                         | 0.036                          | 1.740 | 58.926                                                   | 3.882 | 31.954 | 5.237  |
| 42           | 38.610                            | 6.100  | 8.080 | 0.083            | 25.640               | 21.900                         | <0.027                         | 0.591 | 53.693                                                   | 1.315 | 23.914 | 21.079 |
| 43           | 38.810                            | 6.630  | 7.070 | <0.023           | 25.820               | 21.910                         | 0.031                          | 0.454 | 54.606                                                   | 0.996 | 25.742 | 18.656 |
| 44           | 37.970                            | 7.310  | 5.100 | <0.023           | 25.980               | 21.480                         | <0.027                         | 1.580 | 54.567                                                   | 3.598 | 29.331 | 12.504 |
| 45           | 38.620                            | 8.120  | 1.630 | <0.023           | 27.640               | 21.940                         | <0.027                         | 2.320 | 59.149                                                   | 5.100 | 31.405 | 4.346  |

| Grain number | electron microprobe data<br>[wt%] |       |        |                  |                      |                                |                                |       | normalised endmembers calculated <sup>59</sup><br>[mol%] |       |        |        |
|--------------|-----------------------------------|-------|--------|------------------|----------------------|--------------------------------|--------------------------------|-------|----------------------------------------------------------|-------|--------|--------|
|              | SiO <sub>2</sub>                  | MgO   | CaO    | TiO <sub>2</sub> | FeO <sub>total</sub> | Al <sub>2</sub> O <sub>3</sub> | Cr <sub>2</sub> O <sub>3</sub> | MnO   | Alm                                                      | Sps   | Prp    | Grs    |
| 46           | 39.140                            | 9.420 | 3.760  | 0.048            | 25.320               | 22.170                         | <0.026                         | 0.622 | 53.037                                                   | 1.361 | 36.197 | 9.405  |
| 47           | 38.300                            | 6.570 | 10.170 | 0.026            | 22.500               | 21.710                         | <0.027                         | 0.771 | 45.521                                                   | 1.748 | 26.266 | 26.465 |
| 48           | 38.640                            | 6.900 | 6.860  | 0.025            | 24.620               | 22.000                         | <0.026                         | 1.570 | 51.449                                                   | 3.480 | 26.878 | 18.194 |
| 49           | 38.190                            | 8.120 | 1.194  | <0.023           | 30.180               | 21.940                         | <0.027                         | 0.589 | 63.904                                                   | 1.312 | 31.825 | 2.960  |
| 50           | 37.170                            | 1.472 | 8.440  | 0.085            | 30.370               | 21.260                         | <0.028                         | 1.890 | 66.305                                                   | 4.354 | 5.963  | 23.379 |
| 98a          | 38.220                            | 6.440 | 5.470  | 0.026            | 26.100               | 21.610                         | <0.027                         | 1.690 | 56.296                                                   | 3.779 | 25.317 | 14.608 |
| 98b          | 39.220                            | 6.680 | 5.170  | <0.023           | 26.680               | 21.990                         | <0.026                         | 1.600 | 57.400                                                   | 3.481 | 25.083 | 14.036 |
| 98c          | 39.240                            | 6.470 | 5.270  | <0.023           | 26.480               | 22.110                         | <0.027                         | 1.570 | 57.121                                                   | 3.432 | 24.882 | 14.565 |
| 98d          | 38.820                            | 6.910 | 5.450  | <0.024           | 26.280               | 21.750                         | <0.026                         | 1.560 | 55.853                                                   | 3.454 | 26.938 | 13.754 |
| 98e          | 38.210                            | 6.800 | 5.220  | 0.026            | 26.110               | 21.520                         | <0.026                         | 1.670 | 55.990                                                   | 3.759 | 26.912 | 13.339 |
| 98f          | 37.580                            | 7.390 | 5.020  | <0.023           | 26.210               | 21.210                         | <0.027                         | 1.680 | 54.417                                                   | 3.920 | 30.336 | 11.327 |
| 98g          | 38.580                            | 7.040 | 5.340  | <0.023           | 25.830               | 21.590                         | <0.027                         | 1.660 | 55.207                                                   | 3.702 | 27.649 | 13.442 |
| 98h          | 39.060                            | 6.690 | 5.520  | 0.029            | 26.300               | 22.040                         | <0.027                         | 1.620 | 56.127                                                   | 3.531 | 25.654 | 14.688 |
| 98i          | 37.850                            | 7.240 | 5.160  | 0.032            | 25.990               | 21.520                         | <0.027                         | 1.640 | 54.406                                                   | 3.751 | 29.125 | 12.718 |
| 98j          | 37.460                            | 7.490 | 5.160  | <0.022           | 25.580               | 21.140                         | <0.026                         | 1.910 | 52.976                                                   | 4.480 | 30.894 | 11.650 |
| 98n          | 38.600                            | 7.130 | 5.080  | <0.023           | 25.140               | 21.550                         | <0.027                         | 2.210 | 54.243                                                   | 4.917 | 27.912 | 12.927 |
| 98o          | 37.580                            | 7.430 | 5.140  | <0.023           | 25.550               | 21.390                         | <0.026                         | 1.690 | 53.287                                                   | 3.903 | 30.171 | 12.638 |
| 142a         | 38.740                            | 6.680 | 6.930  | 0.046            | 25.160               | 21.870                         | <0.026                         | 0.935 | 53.637                                                   | 2.067 | 25.927 | 18.369 |
| 142b         | 39.200                            | 6.660 | 6.800  | 0.051            | 25.660               | 22.050                         | <0.026                         | 0.837 | 54.709                                                   | 1.823 | 25.496 | 17.971 |
| 142c         | 39.440                            | 6.580 | 6.770  | <0.023           | 25.510               | 22.360                         | <0.026                         | 0.816 | 54.578                                                   | 1.771 | 25.096 | 18.555 |
| 142d         | 40.160                            | 6.300 | 7.150  | <0.023           | 24.950               | 22.780                         | <0.026                         | 0.791 | 54.069                                                   | 1.734 | 24.341 | 19.856 |
| 142e         | 42.300                            | 4.180 | 7.050  | <0.023           | 25.380               | 23.740                         | <0.026                         | 0.661 | 59.670                                                   | 1.573 | 17.520 | 21.236 |
| 142f         | 39.240                            | 6.490 | 6.820  | 0.029            | 25.790               | 22.210                         | <0.026                         | 0.564 | 55.264                                                   | 1.225 | 24.792 | 18.719 |
| 142g         | 39.140                            | 6.610 | 6.780  | <0.023           | 25.820               | 22.130                         | <0.026                         | 0.661 | 54.951                                                   | 1.435 | 25.233 | 18.381 |
| 142h         | 38.690                            | 6.530 | 6.740  | <0.023           | 26.210               | 21.750                         | <0.027                         | 0.549 | 55.713                                                   | 1.222 | 25.499 | 17.566 |
| 142i         | 38.670                            | 6.510 | 6.880  | 0.049            | 26.360               | 22.060                         | <0.026                         | 0.550 | 55.208                                                   | 1.214 | 25.309 | 18.270 |
| 142j         | 38.730                            | 6.420 | 6.830  | 0.038            | 26.530               | 21.770                         | <0.026                         | 0.515 | 56.226                                                   | 1.145 | 25.107 | 17.522 |
| 142k         | 38.910                            | 6.270 | 6.650  | 0.028            | 26.430               | 21.880                         | <0.027                         | 0.613 | 56.759                                                   | 1.340 | 24.184 | 17.718 |
| 142l         | 39.730                            | 5.670 | 6.740  | 0.041            | 26.000               | 22.350                         | <0.026                         | 0.572 | 57.368                                                   | 1.276 | 22.299 | 19.057 |
| 142m         | 41.500                            | 5.280 | 6.930  | <0.023           | 26.100               | 23.640                         | <0.027                         | 0.609 | 57.990                                                   | 1.375 | 20.915 | 19.721 |
| 142n         | 38.370                            | 6.450 | 7.380  | 0.024            | 25.410               | 21.420                         | <0.026                         | 0.719 | 54.051                                                   | 1.629 | 25.655 | 18.666 |
| 142o         | 38.810                            | 6.440 | 7.100  | <0.023           | 25.770               | 21.830                         | <0.026                         | 0.662 | 54.814                                                   | 1.461 | 25.008 | 18.718 |
| 142p         | 37.990                            | 7.240 | 6.430  | 0.040            | 25.300               | 21.390                         | <0.026                         | 0.939 | 52.909                                                   | 2.151 | 29.222 | 15.718 |

| Grain number | electron microprobe data<br>[wt%] |        |       |                  |                      |                                |                                |       | normalised endmembers calculated <sup>59</sup><br>[mol%] |       |        |        |
|--------------|-----------------------------------|--------|-------|------------------|----------------------|--------------------------------|--------------------------------|-------|----------------------------------------------------------|-------|--------|--------|
|              | SiO <sub>2</sub>                  | MgO    | CaO   | TiO <sub>2</sub> | FeO <sub>total</sub> | Al <sub>2</sub> O <sub>3</sub> | Cr <sub>2</sub> O <sub>3</sub> | MnO   | Alm                                                      | Sps   | Prp    | Grs    |
| 142q         | 38.330                            | 6.400  | 7.100 | <0.023           | 25.940               | 21.570                         | <0.027                         | 0.658 | 54.845                                                   | 1.481 | 25.375 | 18.299 |
| 142r         | 37.980                            | 6.560  | 7.360 | 0.032            | 25.150               | 21.520                         | <0.026                         | 0.875 | 52.706                                                   | 1.990 | 26.301 | 19.003 |
| 142s         | 37.970                            | 6.670  | 7.170 | <0.023           | 25.130               | 21.540                         | <0.026                         | 0.954 | 52.508                                                   | 2.176 | 26.725 | 18.591 |
| 142t         | 38.520                            | 6.560  | 6.900 | 0.037            | 25.840               | 21.640                         | <0.027                         | 0.824 | 54.704                                                   | 1.849 | 25.873 | 17.574 |
| 209a         | 38.030                            | 6.010  | 9.640 | <0.023           | 23.860               | 21.350                         | <0.026                         | 0.549 | 49.514                                                   | 1.265 | 24.276 | 24.945 |
| 209b         | 38.730                            | 5.860  | 9.530 | 0.029            | 24.070               | 21.730                         | <0.027                         | 0.542 | 50.819                                                   | 1.208 | 22.948 | 25.026 |
| 209c         | 39.240                            | 5.830  | 9.270 | <0.023           | 24.150               | 22.030                         | <0.027                         | 0.558 | 51.726                                                   | 1.217 | 21.763 | 25.294 |
| 209d         | 39.660                            | 5.650  | 9.890 | 0.031            | 23.710               | 22.170                         | <0.026                         | 0.564 | 50.594                                                   | 1.217 | 21.489 | 26.700 |
| 209e         | 39.120                            | 5.830  | 9.540 | 0.026            | 23.850               | 22.280                         | <0.026                         | 0.549 | 50.532                                                   | 1.185 | 22.223 | 26.059 |
| 209f         | 38.760                            | 6.180  | 8.930 | 0.026            | 23.900               | 22.200                         | <0.027                         | 0.506 | 50.499                                                   | 1.109 | 23.773 | 24.620 |
| 209g         | 37.930                            | 6.200  | 9.110 | 0.028            | 23.990               | 21.610                         | <0.026                         | 0.492 | 49.793                                                   | 1.120 | 24.834 | 24.253 |
| 209h         | 37.560                            | 6.230  | 8.840 | <0.023           | 24.150               | 21.360                         | <0.027                         | 0.522 | 50.089                                                   | 1.202 | 25.342 | 23.367 |
| 209i         | 37.230                            | 6.310  | 8.950 | 0.026            | 24.240               | 21.120                         | <0.026                         | 0.518 | 49.628                                                   | 1.224 | 26.208 | 22.941 |
| 209j         | 37.720                            | 6.240  | 9.110 | <0.023           | 24.010               | 21.360                         | <0.026                         | 0.523 | 49.633                                                   | 1.204 | 25.356 | 23.806 |
| 209k         | 38.100                            | 5.960  | 9.400 | <0.023           | 23.900               | 21.470                         | <0.026                         | 0.516 | 50.165                                                   | 1.168 | 23.827 | 24.840 |
| 209l         | 38.590                            | 5.920  | 9.660 | 0.050            | 23.730               | 21.750                         | <0.026                         | 0.520 | 50.046                                                   | 1.157 | 23.231 | 25.566 |
| 209m         | 38.520                            | 6.130  | 9.050 | 0.058            | 24.070               | 21.870                         | <0.026                         | 0.503 | 50.674                                                   | 1.113 | 23.989 | 24.224 |
| 209n         | 38.610                            | 6.170  | 8.980 | 0.030            | 23.960               | 21.780                         | <0.026                         | 0.481 | 50.855                                                   | 1.069 | 24.099 | 23.977 |
| 209o         | 38.840                            | 5.930  | 9.480 | <0.023           | 23.720               | 21.740                         | <0.027                         | 0.512 | 50.619                                                   | 1.126 | 23.057 | 25.198 |
| 209p         | 39.020                            | 5.680  | 9.650 | <0.022           | 23.740               | 21.910                         | <0.026                         | 0.508 | 51.082                                                   | 1.107 | 21.395 | 26.416 |
| 209q         | 38.940                            | 5.990  | 9.160 | <0.023           | 23.900               | 21.920                         | <0.026                         | 0.516 | 51.063                                                   | 1.128 | 23.078 | 24.731 |
| 209r         | 37.390                            | 6.330  | 9.240 | 0.037            | 23.940               | 20.850                         | <0.026                         | 0.532 | 49.406                                                   | 1.262 | 26.447 | 22.884 |
| 209s         | 38.160                            | 6.280  | 9.060 | 0.031            | 24.060               | 21.690                         | <0.027                         | 0.508 | 49.902                                                   | 1.149 | 25.003 | 23.947 |
| 209t         | 38.650                            | 6.040  | 9.190 | <0.023           | 23.890               | 21.890                         | <0.026                         | 0.544 | 50.467                                                   | 1.198 | 23.503 | 24.832 |
| 352          | 40.360                            | 13.760 | 3.650 | <0.022           | 19.710               | 22.790                         | <0.025                         | 0.399 | 39.177                                                   | 0.848 | 51.517 | 8.458  |
| 353          | 40.210                            | 4.730  | 8.930 | 0.037            | 25.100               | 22.580                         | 0.035                          | 0.555 | 55.184                                                   | 1.231 | 18.543 | 25.041 |
| 354          | 38.560                            | 7.960  | 1.177 | <0.022           | 29.590               | 21.890                         | <0.026                         | 1.129 | 63.581                                                   | 2.483 | 30.830 | 3.106  |
| 355          | 38.750                            | 7.670  | 4.390 | 0.076            | 27.900               | 21.760                         | <0.027                         | 0.485 | 58.722                                                   | 1.084 | 30.161 | 10.033 |
| 356          | 38.010                            | 8.510  | 6.280 | 0.035            | 24.390               | 21.640                         | <0.026                         | 0.469 | 49.373                                                   | 1.075 | 34.373 | 15.179 |
| 357          | 37.470                            | 5.850  | 1.930 | <0.023           | 31.080               | 21.530                         | <0.027                         | 1.820 | 67.293                                                   | 4.123 | 23.345 | 5.240  |
| 358          | 38.850                            | 6.480  | 6.340 | 0.029            | 25.190               | 22.030                         | <0.026                         | 1.620 | 54.191                                                   | 3.535 | 24.867 | 17.406 |
| 359          | 38.350                            | 4.410  | 7.550 | 0.043            | 28.040               | 21.460                         | <0.027                         | 0.658 | 61.116                                                   | 1.469 | 17.350 | 20.065 |
| 360          | 39.110                            | 8.320  | 7.950 | 0.047            | 22.200               | 22.360                         | <0.026                         | 0.501 | 45.758                                                   | 1.087 | 31.887 | 21.268 |

| Grain number | electron microprobe data<br>[wt%] |        |        |                  |                      |                                |                                |       | normalised endmembers calculated <sup>59</sup><br>[mol%] |       |        |        |
|--------------|-----------------------------------|--------|--------|------------------|----------------------|--------------------------------|--------------------------------|-------|----------------------------------------------------------|-------|--------|--------|
|              | SiO <sub>2</sub>                  | MgO    | CaO    | TiO <sub>2</sub> | FeO <sub>total</sub> | Al <sub>2</sub> O <sub>3</sub> | Cr <sub>2</sub> O <sub>3</sub> | MnO   | Alm                                                      | Sps   | Prp    | Grs    |
| 361          | 38.870                            | 8.470  | 8.430  | <0.023           | 21.460               | 22.230                         | 0.082                          | 0.425 | 43.783                                                   | 0.932 | 32.814 | 22.470 |
| 362          | 39.310                            | 6.840  | 10.660 | 0.049            | 21.420               | 22.070                         | <0.026                         | 0.273 | 45.039                                                   | 0.599 | 26.248 | 28.115 |
| 363          | 38.050                            | 5.780  | 3.400  | <0.023           | 29.320               | 21.760                         | <0.027                         | 2.520 | 62.543                                                   | 5.646 | 22.777 | 9.034  |
| 364          | 38.030                            | 6.150  | 2.070  | <0.023           | 29.500               | 21.880                         | 0.059                          | 2.780 | 63.989                                                   | 6.204 | 24.149 | 5.658  |
| 365          | 38.780                            | 6.110  | 9.650  | 0.028            | 23.160               | 21.930                         | <0.026                         | 0.380 | 49.354                                                   | 0.838 | 23.617 | 26.191 |
| 366          | 38.720                            | 7.310  | 7.380  | <0.023           | 25.130               | 21.380                         | <0.026                         | 0.468 | 52.330                                                   | 1.057 | 29.222 | 17.391 |
| 367          | 38.500                            | 6.960  | 2.570  | <0.023           | 29.790               | 21.830                         | <0.027                         | 1.095 | 63.830                                                   | 2.425 | 27.094 | 6.650  |
| 368          | 38.420                            | 5.830  | 2.180  | <0.023           | 30.840               | 21.950                         | <0.027                         | 2.150 | 66.556                                                   | 4.742 | 22.624 | 6.078  |
| 369          | 38.440                            | 7.430  | 2.330  | 0.027            | 29.360               | 21.810                         | <0.026                         | 1.202 | 62.637                                                   | 2.674 | 29.067 | 5.622  |
| 370          | 39.340                            | 8.510  | 7.770  | 0.037            | 22.620               | 22.320                         | <0.026                         | 0.459 | 46.245                                                   | 1.003 | 32.658 | 20.094 |
| 371          | 39.550                            | 10.970 | 5.200  | 0.027            | 21.400               | 22.120                         | 0.256                          | 0.669 | 44.159                                                   | 1.463 | 42.285 | 12.093 |
| 372          | 39.370                            | 6.660  | 6.890  | <0.023           | 25.140               | 22.460                         | <0.027                         | 0.833 | 53.859                                                   | 1.803 | 25.428 | 18.910 |
| 373          | 38.630                            | 6.710  | 3.570  | <0.023           | 28.270               | 22.010                         | <0.027                         | 1.700 | 60.472                                                   | 3.727 | 25.897 | 9.905  |
| 374          | 38.760                            | 7.810  | 3.100  | <0.023           | 27.650               | 22.120                         | <0.027                         | 0.995 | 59.215                                                   | 2.178 | 30.034 | 8.573  |
| 375          | 38.640                            | 8.040  | 1.650  | <0.023           | 28.940               | 21.970                         | <0.027                         | 0.871 | 62.492                                                   | 1.913 | 31.016 | 4.578  |
| 376          | 38.680                            | 9.090  | 4.490  | 0.035            | 25.530               | 22.170                         | <0.027                         | 0.475 | 52.237                                                   | 1.052 | 35.495 | 11.216 |
| 377          | 39.360                            | 8.570  | 6.260  | 0.050            | 23.640               | 22.390                         | <0.026                         | 0.427 | 49.709                                                   | 0.924 | 32.476 | 16.891 |
| 378a         | 38.980                            | 6.070  | 2.980  | <0.023           | 29.210               | 22.040                         | <0.027                         | 1.690 | 64.121                                                   | 3.753 | 23.747 | 8.379  |
| 378b         | 38.910                            | 6.250  | 3.370  | <0.023           | 28.730               | 22.280                         | <0.027                         | 1.720 | 62.548                                                   | 3.792 | 24.257 | 9.403  |
| 378c         | 38.240                            | 6.500  | 2.560  | <0.023           | 29.800               | 21.760                         | <0.027                         | 1.720 | 63.979                                                   | 3.825 | 25.458 | 6.739  |
| 378d         | 38.810                            | 6.770  | 2.520  | 0.023            | 29.200               | 22.010                         | <0.027                         | 1.750 | 63.110                                                   | 3.830 | 26.080 | 6.979  |
| 378e         | 38.980                            | 6.590  | 2.580  | <0.023           | 28.880               | 22.240                         | <0.027                         | 1.680 | 63.288                                                   | 3.727 | 25.744 | 7.241  |
| 378f         | 39.100                            | 6.580  | 3.470  | <0.024           | 28.500               | 22.120                         | 0.039                          | 1.700 | 61.504                                                   | 3.714 | 25.312 | 9.471  |
| 378g         | 39.090                            | 6.850  | 2.560  | <0.023           | 29.070               | 22.310                         | 0.037                          | 1.650 | 62.951                                                   | 3.618 | 26.438 | 6.993  |
| 378h         | 38.450                            | 6.940  | 2.850  | <0.023           | 28.540               | 21.840                         | <0.027                         | 1.610 | 61.609                                                   | 3.550 | 26.908 | 7.933  |
| 378i         | 38.460                            | 7.620  | 2.450  | <0.023           | 28.800               | 21.640                         | <0.027                         | 1.680 | 61.063                                                   | 3.771 | 30.089 | 5.077  |
| 378j         | 38.490                            | 7.490  | 2.640  | <0.023           | 28.640               | 21.690                         | 0.033                          | 1.650 | 60.943                                                   | 3.684 | 29.459 | 5.914  |
| 378k         | 37.970                            | 8.180  | 1.760  | <0.023           | 28.840               | 21.330                         | <0.027                         | 1.670 | 60.940                                                   | 3.833 | 33.065 | 2.162  |
| 378l         | 38.600                            | 7.330  | 2.280  | <0.024           | 29.390               | 21.810                         | <0.027                         | 1.740 | 62.335                                                   | 3.869 | 28.672 | 5.124  |
| 378m         | 38.490                            | 7.490  | 1.740  | <0.023           | 29.390               | 21.920                         | <0.027                         | 1.620 | 62.770                                                   | 3.574 | 29.093 | 4.563  |
| 378n         | 38.650                            | 6.520  | 2.260  | <0.024           | 30.110               | 21.800                         | <0.027                         | 1.720 | 65.060                                                   | 3.786 | 25.239 | 5.915  |
| 378o         | 38.400                            | 6.110  | 2.710  | <0.023           | 30.210               | 21.740                         | <0.027                         | 1.680 | 65.267                                                   | 3.716 | 23.817 | 7.200  |
| 378p         | 38.400                            | 7.580  | 1.960  | <0.023           | 29.000               | 21.810                         | <0.027                         | 1.700 | 61.826                                                   | 3.778 | 29.654 | 4.743  |

| Grain number | electron microprobe data<br>[wt%] |        |        |                  |                      |                                |                                |       | normalised endmembers calculated <sup>59</sup><br>[mol%] |       |        |        |
|--------------|-----------------------------------|--------|--------|------------------|----------------------|--------------------------------|--------------------------------|-------|----------------------------------------------------------|-------|--------|--------|
|              | SiO <sub>2</sub>                  | MgO    | CaO    | TiO <sub>2</sub> | FeO <sub>total</sub> | Al <sub>2</sub> O <sub>3</sub> | Cr <sub>2</sub> O <sub>3</sub> | MnO   | Alm                                                      | Sps   | Prp    | Grs    |
| 378q         | 38.710                            | 6.880  | 2.200  | <0.023           | 29.890               | 22.000                         | <0.027                         | 1.680 | 63.849                                                   | 3.682 | 26.542 | 5.926  |
| 378r         | 38.530                            | 6.330  | 2.870  | <0.023           | 29.240               | 21.670                         | <0.027                         | 1.650 | 63.826                                                   | 3.649 | 24.634 | 7.891  |
| 378s         | 38.510                            | 7.510  | 1.550  | <0.023           | 29.680               | 21.890                         | <0.027                         | 1.680 | 63.271                                                   | 3.716 | 29.235 | 3.777  |
| 378t         | 38.020                            | 7.880  | 1.510  | <0.023           | 29.380               | 21.680                         | <0.027                         | 1.710 | 61.975                                                   | 3.866 | 31.374 | 2.784  |
| 379          | 38.400                            | 6.820  | 3.700  | <0.024           | 28.110               | 21.870                         | <0.027                         | 1.640 | 59.880                                                   | 3.636 | 26.608 | 9.875  |
| 380          | 38.310                            | 4.130  | 6.850  | <0.023           | 28.320               | 21.980                         | 0.040                          | 1.400 | 61.752                                                   | 3.098 | 16.092 | 19.059 |
| 381          | 39.680                            | 8.790  | 8.750  | 0.072            | 20.810               | 22.230                         | <0.026                         | 0.331 | 43.362                                                   | 0.722 | 33.482 | 22.433 |
| 382          | 38.620                            | 7.890  | 1.275  | <0.024           | 30.130               | 22.160                         | 0.053                          | 0.870 | 64.199                                                   | 1.909 | 30.509 | 3.383  |
| 383          | 38.280                            | 5.330  | 3.890  | 0.033            | 30.010               | 21.810                         | <0.027                         | 1.470 | 65.187                                                   | 3.253 | 20.765 | 10.794 |
| 384          | 39.230                            | 9.230  | 2.050  | <0.023           | 27.740               | 22.130                         | <0.027                         | 0.911 | 58.042                                                   | 1.985 | 35.495 | 4.479  |
| 385          | 38.640                            | 8.410  | 1.700  | <0.023           | 29.030               | 22.080                         | <0.026                         | 0.653 | 61.508                                                   | 1.433 | 32.495 | 4.563  |
| 386          | 39.650                            | 10.980 | 1.560  | <0.023           | 25.390               | 22.490                         | 0.041                          | 0.813 | 52.936                                                   | 1.742 | 41.414 | 3.908  |
| 387          | 39.230                            | 6.750  | 9.920  | 0.068            | 22.350               | 22.230                         | <0.026                         | 0.381 | 46.863                                                   | 0.830 | 25.815 | 26.493 |
| 388          | 39.020                            | 5.600  | 11.940 | 0.029            | 20.810               | 22.060                         | <0.026                         | 1.024 | 43.924                                                   | 2.243 | 21.527 | 32.306 |
| 389          | 38.830                            | 5.730  | 11.740 | 0.064            | 21.060               | 22.170                         | 0.051                          | 0.436 | 44.875                                                   | 0.958 | 22.044 | 32.124 |
| 390a         | 38.860                            | 5.670  | 8.000  | 0.051            | 25.850               | 22.110                         | <0.027                         | 0.501 | 55.222                                                   | 1.095 | 21.761 | 21.922 |
| 390b         | 38.300                            | 6.580  | 6.750  | 0.034            | 25.750               | 21.760                         | 0.027                          | 0.783 | 54.485                                                   | 1.749 | 25.918 | 17.848 |
| 391          | 38.930                            | 7.120  | 5.040  | <0.022           | 26.010               | 22.010                         | <0.027                         | 1.400 | 55.849                                                   | 3.052 | 27.279 | 13.820 |
| 392          | 38.720                            | 5.920  | 9.390  | <0.023           | 23.730               | 21.610                         | <0.027                         | 0.832 | 50.353                                                   | 1.851 | 23.228 | 24.568 |
| 393          | 38.880                            | 7.030  | 5.260  | <0.023           | 27.290               | 21.900                         | <0.026                         | 0.417 | 58.133                                                   | 0.920 | 27.190 | 13.757 |
| 394          | 38.670                            | 6.670  | 6.040  | 0.024            | 25.670               | 21.630                         | <0.027                         | 1.540 | 55.031                                                   | 3.429 | 26.096 | 15.444 |
| 396          | 38.360                            | 7.090  | 2.330  | <0.024           | 29.590               | 21.960                         | <0.027                         | 1.190 | 63.308                                                   | 2.629 | 27.554 | 6.508  |
| 397          | 40.620                            | 13.650 | 3.720  | 0.040            | 19.590               | 22.950                         | <0.026                         | 0.351 | 39.699                                                   | 0.738 | 50.429 | 9.134  |
| 398          | 38.530                            | 7.290  | 5.420  | <0.023           | 25.410               | 21.870                         | <0.026                         | 1.290 | 54.159                                                   | 2.850 | 28.348 | 14.644 |
| 399          | 38.720                            | 5.910  | 10.680 | 0.034            | 22.240               | 22.100                         | <0.027                         | 0.597 | 46.633                                                   | 1.316 | 22.846 | 29.205 |
| 400          | 38.500                            | 0.443  | 22.400 | 0.098            | 17.650               | 21.190                         | <0.026                         | 0.269 | 36.822                                                   | 0.614 | 1.781  | 60.783 |
| 452a         | 40.070                            | 5.660  | 6.850  | <0.023           | 25.540               | 22.560                         | <0.027                         | 0.923 | 56.329                                                   | 2.058 | 22.254 | 19.359 |
| 452b         | 39.190                            | 6.190  | 6.260  | <0.024           | 26.550               | 21.990                         | <0.026                         | 0.965 | 57.117                                                   | 2.098 | 23.740 | 17.045 |
| 452c         | 38.870                            | 6.040  | 6.370  | 0.030            | 26.100               | 21.970                         | <0.026                         | 0.959 | 56.739                                                   | 2.114 | 23.402 | 17.745 |
| 452d         | 38.660                            | 6.220  | 7.270  | 0.034            | 25.760               | 21.440                         | <0.026                         | 0.833 | 55.337                                                   | 1.864 | 24.524 | 18.275 |
| 452e         | 37.780                            | 6.370  | 7.110  | <0.023           | 25.720               | 21.200                         | <0.026                         | 0.871 | 54.288                                                   | 2.014 | 25.876 | 17.821 |
| 452f         | 36.670                            | 6.840  | 6.850  | 0.031            | 25.400               | 20.520                         | <0.027                         | 0.836 | 52.977                                                   | 2.032 | 29.277 | 15.714 |
| 452g         | 37.250                            | 6.570  | 6.580  | <0.022           | 25.560               | 20.990                         | <0.027                         | 0.889 | 54.299                                                   | 2.082 | 27.061 | 16.559 |

| Grain number | electron microprobe data<br>[wt%] |        |        |                  |                      |                                |                                |       | normalised endmembers calculated <sup>59</sup><br>[mol%] |        |        |        |
|--------------|-----------------------------------|--------|--------|------------------|----------------------|--------------------------------|--------------------------------|-------|----------------------------------------------------------|--------|--------|--------|
|              | SiO <sub>2</sub>                  | MgO    | CaO    | TiO <sub>2</sub> | FeO <sub>total</sub> | Al <sub>2</sub> O <sub>3</sub> | Cr <sub>2</sub> O <sub>3</sub> | MnO   | Alm                                                      | Sps    | Prp    | Grs    |
| 452h         | 38.110                            | 6.180  | 7.030  | 0.045            | 25.760               | 21.290                         | <0.027                         | 0.839 | 55.474                                                   | 1.902  | 24.704 | 17.919 |
| 452i         | 38.660                            | 6.060  | 7.230  | 0.051            | 26.050               | 21.860                         | <0.026                         | 0.852 | 55.383                                                   | 1.881  | 23.605 | 19.132 |
| 452j         | 38.330                            | 6.180  | 7.500  | 0.031            | 25.480               | 21.700                         | <0.027                         | 0.764 | 54.062                                                   | 1.707  | 24.343 | 19.888 |
| 452k         | 38.640                            | 6.110  | 7.370  | 0.029            | 25.860               | 21.990                         | <0.026                         | 0.835 | 54.579                                                   | 1.848  | 23.726 | 19.848 |
| 452l         | 39.070                            | 6.320  | 6.330  | <0.023           | 26.360               | 22.040                         | <0.027                         | 0.908 | 56.581                                                   | 1.973  | 24.179 | 17.268 |
| 452m         | 38.770                            | 6.110  | 7.240  | <0.023           | 25.460               | 21.890                         | <0.026                         | 0.801 | 54.866                                                   | 1.754  | 23.544 | 19.836 |
| 452n         | 38.120                            | 6.000  | 7.710  | 0.037            | 25.310               | 21.580                         | <0.027                         | 0.736 | 53.997                                                   | 1.656  | 23.768 | 20.579 |
| 706          | 38.960                            | 7.430  | 5.530  | <0.023           | 25.920               | 22.040                         | <0.026                         | 0.819 | 54.904                                                   | 1.788  | 28.603 | 14.706 |
| 707          | 38.290                            | 7.550  | 0.993  | <0.023           | 30.150               | 21.840                         | <0.027                         | 1.850 | 64.165                                                   | 4.118  | 29.591 | 2.125  |
| 708          | 38.390                            | 7.440  | 1.211  | <0.023           | 30.140               | 21.960                         | <0.027                         | 1.470 | 64.484                                                   | 3.243  | 28.888 | 3.384  |
| 709          | 40.360                            | 14.120 | 5.120  | 0.027            | 16.860               | 23.130                         | 0.048                          | 0.545 | 33.256                                                   | 1.145  | 52.301 | 13.298 |
| 710          | 38.430                            | 6.520  | 6.600  | <0.023           | 25.990               | 21.940                         | <0.026                         | 0.450 | 55.379                                                   | 0.998  | 25.325 | 18.298 |
| 711          | 38.760                            | 6.170  | 8.450  | 0.029            | 24.850               | 22.090                         | <0.026                         | 0.520 | 52.142                                                   | 1.147  | 23.873 | 22.838 |
| 712          | 38.020                            | 4.880  | 5.220  | <0.023           | 25.810               | 21.690                         | <0.027                         | 4.920 | 55.393                                                   | 10.998 | 19.203 | 14.407 |
| 713          | 38.190                            | 8.000  | 1.960  | 0.023            | 28.910               | 21.990                         | <0.027                         | 1.244 | 60.853                                                   | 2.774  | 31.375 | 4.998  |
| 714          | 38.460                            | 7.650  | 1.177  | <0.023           | 29.310               | 21.770                         | <0.026                         | 1.560 | 63.645                                                   | 3.432  | 29.661 | 3.262  |
| 715          | 38.070                            | 6.860  | 1.398  | <0.023           | 31.120               | 21.840                         | <0.027                         | 1.139 | 66.714                                                   | 2.536  | 26.880 | 3.870  |
| 716          | 38.390                            | 8.430  | 2.190  | <0.023           | 27.900               | 21.950                         | <0.026                         | 1.063 | 59.065                                                   | 2.354  | 32.880 | 5.702  |
| 717          | 37.800                            | 3.860  | 10.010 | <0.023           | 25.450               | 21.130                         | <0.027                         | 1.610 | 54.268                                                   | 3.707  | 15.649 | 26.376 |
| 718          | 38.440                            | 8.230  | 1.175  | <0.023           | 29.380               | 21.950                         | <0.026                         | 1.010 | 62.688                                                   | 2.230  | 31.964 | 3.118  |
| 719          | 38.810                            | 8.330  | 8.840  | 0.066            | 21.400               | 21.860                         | <0.026                         | 0.316 | 43.975                                                   | 0.703  | 32.699 | 22.623 |
| 720          | 38.500                            | 5.660  | 10.440 | 0.042            | 23.030               | 21.810                         | <0.026                         | 0.483 | 48.593                                                   | 1.071  | 22.160 | 28.177 |
| 721          | 38.320                            | 6.480  | 7.350  | 0.038            | 25.630               | 21.840                         | <0.026                         | 0.464 | 53.885                                                   | 1.034  | 25.489 | 19.593 |
| 722          | 37.840                            | 6.490  | 1.061  | <0.023           | 29.780               | 21.830                         | <0.027                         | 3.130 | 64.421                                                   | 7.011  | 25.568 | 3.000  |
| 723          | 38.030                            | 9.540  | 1.450  | <0.022           | 27.590               | 21.700                         | <0.027                         | 0.770 | 57.741                                                   | 1.747  | 38.012 | 2.501  |
| 724          | 38.000                            | 4.590  | 7.890  | 0.031            | 27.390               | 21.530                         | <0.026                         | 0.552 | 59.124                                                   | 1.240  | 18.176 | 21.460 |
| 725          | 39.070                            | 8.650  | 9.990  | 0.058            | 18.920               | 22.250                         | 0.045                          | 0.354 | 39.190                                                   | 0.771  | 33.212 | 26.827 |
| 726          | 38.110                            | 5.560  | 1.430  | <0.024           | 31.760               | 21.630                         | <0.026                         | 2.300 | 69.201                                                   | 5.122  | 21.771 | 3.906  |
| 727          | 39.690                            | 11.440 | 6.270  | 0.035            | 19.730               | 22.490                         | <0.026                         | 0.357 | 39.882                                                   | 0.776  | 43.476 | 15.867 |
| 728          | 38.900                            | 8.160  | 4.250  | 0.027            | 26.510               | 21.760                         | <0.026                         | 0.937 | 56.072                                                   | 2.079  | 31.866 | 9.984  |
| 729          | 38.420                            | 7.290  | 1.790  | <0.023           | 28.890               | 21.970                         | <0.027                         | 2.180 | 61.910                                                   | 4.810  | 28.288 | 4.991  |
| 730          | 38.230                            | 4.950  | 7.220  | 0.033            | 27.730               | 21.640                         | <0.027                         | 0.517 | 59.826                                                   | 1.155  | 19.449 | 19.571 |
| 731          | 38.270                            | 5.910  | 8.480  | 0.024            | 24.600               | 21.550                         | <0.026                         | 0.610 | 52.652                                                   | 1.367  | 23.337 | 22.644 |

| Grain number | electron microprobe data<br>[wt%] |        |        |                  |                      |                                |                                |        | normalised endmembers calculated <sup>59</sup><br>[mol%] |        |        |        |
|--------------|-----------------------------------|--------|--------|------------------|----------------------|--------------------------------|--------------------------------|--------|----------------------------------------------------------|--------|--------|--------|
|              | SiO <sub>2</sub>                  | MgO    | CaO    | TiO <sub>2</sub> | FeO <sub>total</sub> | Al <sub>2</sub> O <sub>3</sub> | Cr <sub>2</sub> O <sub>3</sub> | MnO    | Alm                                                      | Sps    | Prp    | Grs    |
| 733          | 38.000                            | 6.320  | 2.680  | <0.023           | 30.030               | 21.720                         | <0.026                         | 1.167  | 65.053                                                   | 2.597  | 24.791 | 7.559  |
| 734          | 38.450                            | 4.630  | 8.620  | 0.064            | 26.310               | 21.580                         | <0.027                         | 0.986  | 56.739                                                   | 2.197  | 18.198 | 22.866 |
| 735          | 38.330                            | 7.690  | 5.380  | <0.022           | 25.360               | 21.700                         | <0.026                         | 1.142  | 53.341                                                   | 2.566  | 30.371 | 13.723 |
| 736          | 38.840                            | 7.290  | 6.040  | <0.023           | 26.130               | 22.050                         | <0.026                         | 0.559  | 54.666                                                   | 1.233  | 28.250 | 15.852 |
| 737          | 38.500                            | 8.520  | 1.036  | <0.023           | 29.530               | 22.000                         | <0.026                         | 0.638  | 62.827                                                   | 1.403  | 33.044 | 2.726  |
| 738          | 39.730                            | 12.180 | 6.920  | <0.022           | 17.810               | 22.690                         | <0.026                         | 0.405  | 35.102                                                   | 0.869  | 46.131 | 17.898 |
| 739          | 37.460                            | 1.850  | 9.290  | 0.047            | 29.480               | 21.290                         | <0.027                         | 1.490  | 63.749                                                   | 3.426  | 7.479  | 25.347 |
| 740          | 37.370                            | 2.370  | 8.440  | 0.034            | 19.970               | 21.160                         | <0.027                         | 10.480 | 43.156                                                   | 24.031 | 9.568  | 23.246 |
| 741          | 40.370                            | 12.990 | 5.280  | 0.026            | 18.750               | 22.920                         | <0.026                         | 0.347  | 37.591                                                   | 0.730  | 48.297 | 13.382 |
| 742          | 38.440                            | 7.290  | 3.110  | <0.022           | 28.980               | 21.950                         | <0.027                         | 0.745  | 61.621                                                   | 1.649  | 28.362 | 8.368  |
| 743          | 38.580                            | 8.040  | 1.670  | <0.023           | 28.900               | 22.060                         | <0.026                         | 1.082  | 61.921                                                   | 2.373  | 31.071 | 4.635  |
| 744          | 38.580                            | 5.520  | 9.940  | 0.043            | 24.320               | 21.410                         | <0.026                         | 0.438  | 51.576                                                   | 0.992  | 21.924 | 25.509 |
| 745          | 37.510                            | 6.370  | 1.750  | <0.023           | 31.070               | 21.440                         | <0.026                         | 1.550  | 66.913                                                   | 3.537  | 25.592 | 3.958  |
| 746          | 38.820                            | 6.110  | 8.770  | <0.023           | 23.640               | 22.190                         | <0.026                         | 0.829  | 50.517                                                   | 1.807  | 23.466 | 24.209 |
| 747          | 38.550                            | 8.830  | 1.104  | <0.023           | 28.550               | 22.260                         | 0.028                          | 0.869  | 60.932                                                   | 1.909  | 34.179 | 2.980  |
| 748          | 37.940                            | 7.060  | 1.830  | 0.026            | 29.930               | 21.880                         | <0.027                         | 1.720  | 63.519                                                   | 3.851  | 27.832 | 4.798  |
| 749          | 38.590                            | 7.810  | 4.280  | 0.025            | 27.070               | 21.890                         | <0.026                         | 0.688  | 57.118                                                   | 1.531  | 30.503 | 10.848 |
| 750          | 38.810                            | 8.910  | 6.390  | <0.022           | 22.450               | 22.040                         | <0.026                         | 0.763  | 46.854                                                   | 1.677  | 34.513 | 16.956 |
| 751          | 38.510                            | 4.250  | 13.040 | 0.028            | 21.390               | 21.750                         | <0.026                         | 0.737  | 45.961                                                   | 1.634  | 16.551 | 35.855 |
| 752          | 38.320                            | 7.240  | 1.490  | <0.023           | 29.910               | 21.850                         | <0.026                         | 1.400  | 64.571                                                   | 3.094  | 28.167 | 4.169  |
| 753          | 38.600                            | 7.100  | 10.060 | 0.026            | 21.360               | 21.960                         | <0.026                         | 0.482  | 44.169                                                   | 1.065  | 27.746 | 27.020 |
| 754          | 38.470                            | 9.160  | 1.490  | <0.023           | 27.980               | 22.020                         | <0.027                         | 0.622  | 59.155                                                   | 1.377  | 35.599 | 3.869  |
| 755          | 38.880                            | 9.710  | 1.306  | <0.023           | 26.200               | 22.060                         | <0.027                         | 1.770  | 55.532                                                   | 3.873  | 37.378 | 3.217  |

<sup>59</sup>Locock, A. J. An Excel spreadsheet to recast analyses of garnet into end-member components, and a synopsis of the crystal chemistry of natural silicate garnets. *Comput. Geosci.* **34**, 1769-1780 (2008).
